# Supplementary material for: Research on real-time elimination of UWB radar ranging abnormal value data
Source: Copernicus journal article supplement (doi:10.5194/gi-2019-42), 2020-06-22
Supplement: Supplementary file 2 [file 3.56m.xlsx]

## Sheet: Sheet1
3834
3794
3794
3790
3790
3688
3687
3687
3871
3836
3748
3792
3827
3860
3821
3870
4479
3684
3715
3762
3680
3794
3831
3796
3835
3906
3906
3642
3838
3757
3683
3683
3685
3756
3647
3834
3833
3719
3796
3797
3832
3762
3799
3795
3791
3833
3902
3792
3755
3826
4121
3870
3871
4153
4090
3822
3826
3834
3835
3827
3830
3795
3794
3833
3830
3832
3827
3832
3832
3830
3826
3832
3826
3872
3831
3828
3835
3826
3822
3828
3826
3870
3830
3836
3834
3830
3827
3832
3824
3831
3823
3826
3832
3829
3832
3832
3832
3826
3828
3831
3828
3827
3832
3832
3831
3872
3828
3828
3827
3833
3832
3833
3828
3823
3869
3871
3874
3827
3827
3827
3832
3825
3831
3831
3787
3827
3871
3827
3828
3864
3823
3827
3829
3831
3826
3826
3826
3833
3826
3834
3834
3872
3831
3825
3827
3832
3827
3834
3827
3832
3826
3831
3831
3828
3831
3866
3831
3795
3795
3792
3827
3828
3838
3764
3791
3832
3836
3825
3832
3827
3828
3832
3833
3826
3832
3795
3831
3828
3875
3798
3831
3830
3827
3829
3829
3828
3828
3828
3795
3827
3828
3830
3830
3834
3825
3834
3830
3832
3872
3799
3830
3830
3874
3828
3828
3826
3829
3748
3828
3831
3831
3791
3830
3832
3827
3830
3833
3831
3789
3826
3828
3866
3829
3830
3827
3833
3833
3832
3833
3830
3872
3792
3828
3825
3828
3827
3832
3790
3832
3831
3825
3828
3832
3832
3831
3822
3832
3832
3833
3828
3826
3830
3827
3332
3835
3834
3830
3830
3830
3827
3828
3835
3828
3865
3831
3828
3833
3867
3871
3827
3824
3832
3831
3826
3839
3826
3834
3824
3832
3872
3830
3832
3827
3876
3834
3791
3790
3830
3831
3832
3832
3832
3826
3829
3824
3798
3835
3831
3833
3827
3825
3830
3822
3787
3827
3830
3799
3836
3828
3794
3794
3868
3831
3833
3837
3837
3865
3835
3827
3864
3830
3827
3828
3829
3830
3830
3833
3835
3872
3872
3825
3868
3831
3827
3827
3791
3830
3838
3825
3825
3827
3832
3824
3786
3832
3802
3834
3831
3831
3827
3827
3827
3831
3831
3829
3829
3795
3829
3829
3830
3831
3831
3832
3799
3794
3794
3831
3827
3834
3866
3835
3828
3833
3833
3834
3832
3831
3826
3831
3829
3831
3831
3835
3834
3824
3828
3827
3827
3829
3832
3832
3794
3828
3831
3873
3876
3829
3827
3827
3828
3829
3836
3831
3826
3831
3829
3830
3869
3830
3833
3755
3830
3836
3794
3834
3834
3829
3831
3828
3832
3830
3826
3835
3832
3832
3796
3820
3831
3833
3830
3834
3827
3828
3830
3830
3829
3833
3826
3830
3830
3829
3868
3831
3831
3826
3831
3830
3826
3834
3827
3829
3795
3833
3788
3835
3829
3833
3828
3834
3834
3831
3833
3830
3830
3866
3831
3828
3828
3833
3829
3828
3828
3879
3796
3825
3826
3834
3835
3833
3824
3830
3870
3790
3831
3819
3827
3828
3828
3832
3831
3831
3824
3834
3832
3829
3790
3790
3833
3832
3830
3834
3795
3829
3827
3823
3789
3831
3798
3831
3826
3833
3828
3828
3828
3834
3832
3797
3828
3866
3830
3869
3869
3872
3832
3834
3827
3831
3829
3870
3831
3826
3832
3832
3836
3836
3876
3829
3835
3788
3834
3827
3830
3865
3787
3827
3830
3828
3869
3830
3873
3827
3867
3831
3795
3834
3830
3832
3834
3829
3835
3830
3829
3833
3795
3832
3794
3831
3830
3835
3834
3829
3831
3834
3872
3831
3830
3839
3830
3829
3878
3795
3834
3830
3832
3831
3831
3828
3827
3834
3824
3832
3871
3832
3830
3874
3831
3834
3873
3825
3831
3828
3798
3867
3828
3797
3829
3828
3828
3791
3832
3790
3790
3828
3829
3827
3727
3867
3830
3832
3831
3828
3828
3832
3863
3827
3831
3792
3788
3835
3797
3830
3830
3755
3830
3825
3833
3831
3787
3796
3831
3797
3827
4174
3862
3863
3794
3794
3976
3790
3866
3796
3762
3871
3829
3836
3830
3834
3879
3826
3830
3831
3831
3831
3830
3868
3831
3833
3832
3787
3827
3830
3831
3794
3833
3835
3836
3832
3832
3832
3820
3828
3830
3753
3832
3834
3834
3832
3827
3828
3835
3834
3831
3828
3870
3832
3874
3833
3829
3830
3829
3828
3830
3832
3830
3830
3832
3830
3832
3826
3835
3832
3832
3828
3836
3838
3825
3830
3831
3834
3827
3867
3867
3872
3790
3831
3827
3829
3831
3830
3796
3796
3826
3793
3793
3828
3828
3832
3833
3835
3794
3795
3831
3832
3831
3833
3832
3832
3834
3835
3829
3836
3828
3828
3830
3830
3872
3872
3792
3832
3827
3831
3835
3828
3828
3872
3830
3828
3828
3835
3827
3830
3832
3832
3827
3827
3823
3827
3832
3831
3829
3835
3833
3831
3831
3831
3832
3834
3753
3795
3832
3831
3824
3828
3828
3795
3834
3833
3834
3830
3830
3827
3834
3830
3790
3826
3830
3831
3826
3795
3830
3831
3822
3872
3832
3832
3781
3833
3833
3801
3834
3825
3832
3830
3868
3829
3831
3835
3788
3831
3832
3829
3827
3830
3830
3830
3829
3833
3831
3827
3828
3826
3834
3834
3791
3828
3825
3830
3833
3833
3828
3835
3835
3826
3833
3869
3830
3832
3831
3827
3835
3835
3835
3826
3827
3828
3830
3789
3827
3826
3828
3826
3831
3796
3830
3828
3830
3831
3831
3834
3788
3830
3830
3830
3828
3831
3828
3823
3825
3794
3826
3826
3833
3828
3834
3828
3830
3828
3829
3831
3830
3828
3828
3828
3866
3866
3831
3826
3831
3833
3832
3871
3831
3829
3830
3826
3826
3877
3829
3832
3823
3824
3824
3822
3827
3830
3828
3831
3831
3826
3830
3828
3830
3830
3791
3826
3828
3828
3878
3832
3826
3867
3827
3828
3827
3824
3835
3835
3833
3830
3831
3834
3827
3831
3832
3795
3830
3836
3836
3831
3826
3832
3831
3831
3835
3832
3868
3832
3826
3833
3827
3832
3827
3829
3870
3867
3755
3831
3829
3830
3830
3829
3829
3751
3872
3795
3830
3822
3831
3828
3832
3832
3873
3763
3878
3872
3872
3832
3758
3833
3830
3827
3830
3827
3829
3829
3826
3831
3826
3830
3833
3831
3834
3872
3830
3828
3832
3793
3873
3833
3826
3829
3825
3830
3828
3825
3832
3834
3788
3830
3828
3828
3830
3837
3831
3832
3830
3830
3830
3830
3830
3831
3826
3827
3751
3834
3832
3829
3830
3835
3871
3831
3834
3830
3834
3829
3832
3830
3795
3830
3830
3830
3830
3830
3832
3822
3831
3829
3832
3827
3833
3868
3822
3832
3834
3831
3829
3831
3832
3828
3832
3830
3750
3750
3830
3867
3834
3834
3787
3868
3829
3830
3831
3827
3830
3831
3833
3833
3832
3833
3832
3832
3831
3831
3831
3828
3866
3830
3828
3830
3832
3832
3830
3826
3870
3868
3824
3830
3823
3792
3827
3790
3833
3833
3831
3832
3865
3829
3827
3834
3826
3833
3833
3826
3835
3835
3830
3832
3834
3831
3827
3828
3832
3832
3871
3832
3832
3832
3832
3832
3831
3831
3832
3831
3830
3824
3831
3827
3830
3832
3831
3825
3827
3828
3831
3827
3830
3834
3835
3829
3829
3826
3832
3869
3869
3795
3831
3871
3828
3830
3833
3829
3822
3837
3832
3788
3788
3833
3831
3832
3828
3824
3831
3831
3870
3830
3828
3823
3828
3828
3830
3831
3826
3832
3823
3828
3836
3827
3827
3834
3827
3831
3832
3835
3830
3834
3827
3832
3875
3830
3832
3828
3834
3752
3832
3830
3832
3831
3828
3831
3833
3836
3832
3872
3827
3831
3830
3828
3832
3823
3832
3832
3826
3833
3828
3783
3834
3834
3834
3827
3834
3828
3831
3832
3827
3828
3831
3798
3867
3832
3830
3831
3827
3832
3834
3828
3831
3828
3829
3833
3827
3827
3751
3824
3830
3831
3836
3832
3827
3827
3829
3790
3829
3831
3835
3833
3829
3827
3833
3831
3835
3829
3832
3784
3784
3869
3830
3791
3829
3830
3833
3834
3834
3874
3831
3831
3827
3827
3835
3832
3830
3834
3836
3834
3829
3834
3832
3827
3835
3828
3828
3830
3832
3835
3833
3823
3872
3871
3790
3872
3830
3834
3828
3835
3828
3830
3832
3832
3833
3826
3834
3831
3873
3827
3829
3827
3832
3792
3827
3827
3823
3828
3830
3834
3828
3828
3871
3835
3872
3795
3795
3830
3873
3868
3829
3833
3836
3834
3836
3836
3832
3825
3828
3830
3827
3832
3828
3829
3829
3830
3867
3829
3786
3831
3872
3831
3791
3826
3830
3828
3837
3828
3825
3833
3837
3829
3832
3832
3830
3833
3827
3827
3834
3832
3830
3830
3828
3829
3828
3795
3795
3828
3828
3826
3872
3831
3832
3836
3835
3834
3826
3828
3829
3830
3790
3790
3827
3821
3787
3833
3832
3828
3831
3835
3826
3826
3834
3835
3835
3826
3830
3830
3832
3835
3827
3876
3830
3830
3824
3826
3830
3795
3795
3836
3832
3830
3835
3830
3832
3835
3826
3832
3827
3828
3874
3796
3830
3823
3829
3828
3831
3831
3827
3827
3830
3831
3827
3833
3832
3834
3791
3793
3831
3835
3831
3835
3836
3872
3872
3870
3830
3831
3866
3831
3831
3831
3831
3831
3793
3830
3875
3824
3833
3831
3832
3829
3792
3829
3824
3831
3829
3828
3833
3830
3872
3827
3826
3831
3828
3830
3831
3834
3823
3832
3832
3831
3832
3827
3834
3831
3839
3829
3830
3826
3832
3835
3830
3832
3823
3878
3828
3862
3834
3872
3833
3896
3838
3824
3828
3830
3831
3830
3830
3830
3830
3832
3830
3831
3827
3834
3824
3833
3826
3762
3834
3830
3824
3832
3833
3835
3826
3828
3826
3830
3832
3834
3834
3832
3830
3822
3786
3835
3821
3836
3832
3823
3835
3828
3792
3835
3825
3836
3784
3798
3826
3868
3829
3836
3831
3828
3762
3834
3840
3967
3967
4090
3868
3761
3864
3864
4035
3906
4289
3756
3898
3931
4229
3911
3870
3833
3834
3830
3870
3834
3868
3868
3828
3828
3828
3899
3899
3943
3906
3940
3942
3970
3828
3828
3828
3835
4224
4111
4015
3863
3763
3686
3795
3834
3718
3759
3683
3683
3684
3788
3718
3676
3791
3678
3721
3599
3756
3722
3794
3876
3874
3750
3788
3792
3795
3644
3690
3679
3755
3796
3758
3756
3793
3793
3724
3684
3795
3760
3684
3640
3647
3790
3724
3712
3759
3788
3794
3639
3803
3835
3680
3793
3687
3645
3650
3688
3686
3798
3791
3759
3796
3682
3795
3791
3792
3756
3758
3679
3760
3752
3756
3757
3834
3754
3758
3761
3643
3747
3747
3718
3758
3758
3766
3758
3720
3641
3799
3834
3682
3676
3683
3680
3761
3728
3683
3714
3745
3723
3756
3688
3717
3760
3682
3757
3830
3835
3794
3834
3871
3831
3792
3794
3726
3759
3680
3676
3798
3644
3683
3800
3793
3797
3830
3644
3715
3756
3672
3672
3831
3871
3830
3759
3754
3680
3677
3787
3834
3793
3828
3796
3832
3831
3792
3793
3826
3829
3834
3819
3832
3832
3825
3867
3826
3872
3796
3833
3827
3827
3871
3835
3872
3826
3821
3795
3798
3763
3762
3796
3790
3784
3834
3754
3833
3839
3792
3793
3756
3794
3835
3791
3792
3792
3832
3759
3794
3798
3798
3826
3834
3831
3829
3831
3826
3831
3829
3838
3822
3794
3798
3795
3795
3832
3829
3823
3823
3831
3832
3834
3827
3827
3826
3826
3834
3838
3831
3839
3831
3789
3834
3831
3827
3833
3829
3832
3831
3828
3792
3798
3752
3757
3716
3722
3764
3762
3719
3802
3796
3758
3834
3831
3649
3795
3720
3723
3723
3756
3759
3756
3755
3835
3794
3755
3759
3715
3868
3750
3757
3757
3796
3833
3755
3721
3872
3716
3643
3641
3680
3830
3755
3755
3868
3715
3685
3751
3759
3829
3829
3829
3827
3794
3794
3716
3793
3872
3872
3872
3831
3796
3756
3794
3755
3828
3717
3828
3833
3644
3828
3754
3788
3835
3717
3641
3680
3766
3828
3800
3874
3874
3676
3795
3716
3687
3640
3681
3718
3754
3762
3718
3717
3682
3647
3750
3720
3796
3831
3791
3791
3792
3867
3791
3751
3872
3797
3797
3836
3761
3834
3790
3793
3763
3794
3718
3795
3791
3797
3799
3679
3875
3876
3786
3798
3796
3791
3754
3682
3790
3835
[truncated: 2,023 more rows]
