# Supplementary material for: Research on real-time elimination of UWB radar ranging abnormal value data
Source: Copernicus journal article supplement (doi:10.5194/gi-2019-42), 2020-06-22
Supplement: Supplementary file 3 [file 41.54m.xlsx]

## Sheet: 全部采集数据
102-103
42314
42311
42306
42300
42244
42221
42218
42216
42216
42215
42215
42215
42214
42214
42214
42214
42213
42213
42213
42213
42213
42212
42212
42211
42211
42211
42211
42211
42211
42211
42211
42210
42210
42210
42210
42210
42210
42210
42210
42209
42209
42209
42209
42208
42208
42206
42206
42206
42205
42204
42204
42204
42203
42202
42201
42200
42199
42198
42197
42178
42177
42177
42177
42176
42175
42175
42175
42175
42175
42175
42174
42174
42174
42173
42172
42172
42172
42172
42172
42171
42171
42171
42170
42170
42170
42169
42168
42168
42168
42168
42168
42167
42167
42166
42166
42165
42163
42160
42160
42142
42136
42136
42136
42135
42135
42134
42134
42134
42132
42132
42132
42132
42131
42130
42127
42124
42119
42119
42118
42118
42117
42116
42116
42116
42115
42115
42115
42115
42114
42114
42114
42114
42114
42114
42114
42113
42113
42113
42113
42113
42113
42112
42112
42112
42112
42112
42112
42112
42111
42111
42111
42111
42111
42111
42111
42110
42110
42110
42110
42110
42110
42109
42109
42107
42107
42107
42104
42103
42103
42096
42096
42096
42092
42092
42090
42090
42090
42089
42088
42087
42086
42086
42085
42085
42085
42085
42084
42084
42083
42082
42082
42082
42082
42082
42082
42082
42082
42081
42080
42080
42080
42080
42079
42079
42079
42079
42079
42079
42079
42079
42079
42079
42079
42079
42079
42078
42078
42078
42078
42078
42078
42078
42078
42078
42078
42077
42077
42077
42077
42077
42077
42077
42077
42077
42077
42076
42076
42076
42076
42076
42076
42076
42076
42076
42076
42076
42076
42076
42076
42076
42076
42076
42076
42076
42076
42076
42075
42075
42075
42075
42075
42075
42075
42075
42075
42075
42074
42074
42074
42074
42074
42074
42074
42074
42074
42074
42074
42074
42074
42074
42074
42074
42073
42073
42073
42073
42072
42072
42072
42072
42072
42072
42072
42072
42072
42072
42072
42072
42071
42071
42071
42070
42070
42070
42070
42070
42070
42068
42067
42067
42067
42067
42066
42066
42066
42066
42066
42066
42065
42065
42065
42065
42065
42065
42064
42064
42064
42064
42064
42063
42063
42062
42061
42060
42060
42060
42060
42060
42059
42059
42059
42058
42058
42058
42056
42055
42055
42055
42054
42054
42053
42053
42052
42052
42052
42052
42051
42051
42051
42051
42051
42051
42050
42050
42050
42049
42049
42049
42049
42049
42048
42048
42048
42048
42048
42048
42048
42048
42048
42048
42048
42048
42047
42047
42047
42047
42047
42047
42047
42047
42047
42047
42047
42046
42046
42046
42046
42046
42046
42046
42046
42046
42046
42046
42046
42046
42046
42045
42045
42045
42045
42045
42044
42044
42044
42044
42044
42044
42044
42044
42044
42044
42044
42044
42044
42044
42044
42044
42044
42044
42043
42043
42043
42043
42043
42043
42043
42043
42043
42043
42043
42043
42043
42043
42043
42043
42043
42043
42043
42042
42042
42042
42042
42042
42042
42042
42042
42042
42042
42042
42042
42042
42042
42042
42042
42042
42042
42042
42041
42041
42041
42041
42041
42041
42041
42041
42041
42041
42040
42040
42040
42040
42040
42040
42040
42040
42040
42040
42040
42040
42040
42040
42040
42040
42040
42040
42039
42039
42039
42039
42039
42039
42039
42039
42039
42039
42039
42039
42039
42039
42039
42039
42039
42038
42038
42038
42038
42038
42038
42038
42038
42038
42038
42038
42038
42038
42038
42037
42037
42037
42037
42037
42037
42036
42036
42036
42036
42036
42036
42036
42036
42036
42036
42036
42036
42036
42036
42036
42036
42036
42036
42035
42035
42035
42035
42035
42035
42035
42035
42035
42035
42035
42035
42034
42034
42034
42034
42034
42034
42034
42034
42033
42033
42033
42033
42031
42031
42030
42028
42022
42020
42018
42016
42016
42015
42014
42014
42014
42013
42013
42012
42012
42012
42012
42012
42012
42012
42012
42012
42011
42011
42011
42011
42011
42011
42011
42010
42010
42010
42010
42010
42010
42010
42010
42010
42010
42010
42010
42010
42010
42010
42009
42009
42009
42009
42009
42009
42009
42009
42009
42009
42009
42009
42009
42009
42009
42008
42008
42008
42008
42008
42008
42008
42008
42008
42008
42008
42008
42008
42008
42008
42008
42008
42008
42008
42008
42008
42008
42008
42007
42007
42007
42007
42007
42007
42007
42007
42007
42007
42007
42007
42007
42007
42007
42007
42007
42007
42007
42007
42007
42007
42007
42007
42007
42007
42007
42007
42007
42007
42007
42007
42007
42007
42007
42007
42007
42006
42006
42006
42006
42006
42006
42006
42006
42006
42006
42006
42006
42006
42006
42006
42006
42006
42006
42006
42006
42006
42006
42006
42006
42006
42006
42006
42006
42006
42006
42006
42006
42006
42006
42006
42006
42006
42005
42005
42005
42005
42005
42005
42005
42005
42005
42005
42005
42005
42005
42005
42004
42004
42004
42004
42004
42004
42004
42004
42004
42004
42004
42004
42004
42004
42004
42004
42004
42004
42004
42004
42004
42004
42004
42004
42004
42004
42004
42004
42004
42003
42003
42003
42003
42003
42003
42003
42003
42003
42003
42003
42003
42003
42003
42003
42003
42003
42003
42003
42003
42003
42003
42003
42003
42003
42003
42003
42003
42003
42003
42003
42003
42002
42002
42002
42002
42002
42002
42002
42002
42002
42002
42002
42002
42002
42002
42002
42002
42002
42002
42001
42001
42001
42001
42001
42001
42001
42001
42001
42001
42001
42000
42000
42000
42000
42000
42000
42000
42000
42000
42000
42000
42000
42000
42000
42000
42000
42000
42000
42000
42000
41999
41999
41999
41999
41999
41999
41999
41999
41999
41999
41999
41999
41999
41999
41998
41998
41998
41998
41998
41998
41998
41998
41998
41998
41998
41998
41998
41998
41998
41998
41998
41998
41998
41997
41997
41997
41996
41996
41996
41996
41996
41996
41996
41996
41995
41994
41994
41994
41994
41994
41992
41992
41991
41990
41988
41988
41985
41984
41984
41983
41983
41983
41982
41982
41982
41981
41981
41981
41981
41980
41980
41980
41980
41980
41979
41979
41979
41979
41979
41979
41978
41978
41978
41978
41978
41978
41978
41978
41977
41977
41977
41977
41977
41977
41977
41977
41977
41976
41976
41976
41976
41976
41976
41976
41976
41976
41976
41976
41976
41976
41976
41976
41976
41976
41976
41976
41976
41975
41975
41975
41975
41975
41975
41975
41975
41975
41975
41975
41975
41975
41975
41975
41975
41975
41974
41974
41974
41974
41974
41974
41974
41974
41974
41974
41974
41974
41974
41974
41974
41974
41974
41973
41973
41973
41973
41973
41973
41973
41972
41972
41972
41972
41972
41972
41972
41972
41972
41972
41972
41972
41972
41972
41972
41972
41972
41972
41971
41971
41971
41971
41971
41971
41971
41971
41971
41971
41971
41971
41971
41971
41971
41971
41971
41971
41971
41971
41971
41971
41970
41970
41970
41970
41970
41970
41970
41970
41970
41970
41970
41970
41970
41970
41970
41970
41970
41970
41970
41970
41970
41970
41970
41970
41970
41970
41970
41970
41970
41970
41969
41969
41969
41969
41969
41969
41969
41969
41969
41969
41969
41969
41968
41968
41968
41968
41968
41968
41968
41968
41968
41968
41968
41968
41968
41968
41968
41968
41968
41968
41968
41968
41968
41968
41968
41968
41968
41968
41968
41968
41968
41967
41967
41967
41967
41967
41967
41967
41967
41967
41967
41967
41967
41967
41967
41967
41967
41967
41967
41967
41967
41967
41967
41967
41967
41967
41966
41966
41966
41966
41966
41966
41966
41966
41966
41966
41966
41966
41966
41965
41965
41965
41965
41965
41965
41965
41965
41965
41965
41965
41965
41965
41965
41965
41965
41965
41965
41965
41965
41965
41965
41965
41965
41965
41965
41965
41965
41965
41965
41965
41965
41964
41964
41964
41964
41964
41964
41964
41964
41964
41964
41964
41964
41964
41964
41964
41964
41964
41964
41964
41964
41964
41964
41964
41963
41963
41963
41963
41963
41963
41963
41963
41963
41963
41963
41963
41962
41962
41962
41962
41962
41962
41962
41962
41961
41961
41961
41961
41961
41961
41960
41959
41959
41959
41959
41959
41959
41959
41959
41957
41955
41952
41952
41950
41949
41949
41948
41948
41947
41947
41947
41947
41946
41946
41946
41945
41944
41944
41944
41944
41944
41944
41944
41944
41943
41943
41943
41943
41943
41943
41943
41943
41943
41943
41942
41942
41942
41942
41942
41942
41941
41941
41941
41941
41941
41941
41941
41941
41941
41941
41941
41940
41940
41940
41940
41940
41940
41939
41939
41939
41939
41939
41939
41939
41939
41939
41939
41939
41939
41939
41939
41939
41939
41939
41939
41939
41939
41938
41938
41938
41938
41938
41938
41937
41937
41937
41937
41937
41937
41937
41937
41937
41937
41937
41937
41937
41937
41937
41937
41937
41937
41937
41937
41937
41937
41937
41937
41936
41936
41936
41936
41936
41936
41936
41936
41936
41936
41936
41936
41936
41936
41936
41936
41936
41935
41935
41935
41935
41935
41935
41935
41935
41935
41935
41935
41935
41935
41935
41935
41935
41934
41934
41934
41934
41934
41934
41933
41933
41933
41933
41933
41933
41933
41933
41933
41933
41933
41933
41933
41933
41933
41933
41933
41932
41932
41932
41932
41932
41932
41932
41932
41932
41932
41932
41932
41932
41932
41932
41932
41932
41932
41932
41932
41932
41932
41932
41932
41932
41932
41932
41932
41931
41931
41931
41931
41931
41931
41931
41931
41931
41931
41931
41931
41931
41931
41931
41931
41931
41930
41930
41930
41930
41930
41930
41930
41930
41930
41929
41929
41929
41929
41929
41929
41929
41929
41929
41929
41929
41928
41928
41928
41928
41928
41928
41928
41928
41928
41928
41928
41928
41928
41928
41928
41927
41927
41927
41927
41926
41926
41926
41926
41926
41925
41925
41925
41925
41925
41925
41925
41925
41925
41924
41924
41924
41924
41922
41922
41921
41921
41921
41920
41919
41919
41919
41919
41919
41917
41917
41916
41916
41915
41915
41915
41915
41915
41913
41913
41913
41913
41912
41912
41912
41911
41911
41911
41911
41911
41910
41910
41910
41910
41910
41909
41909
41909
41909
41909
41909
41909
41909
41909
41909
41909
41909
41909
41908
41908
41908
41908
41908
41908
41908
41907
41907
41907
41907
41907
41907
41907
41906
41906
41905
41905
41905
41905
41905
41905
41905
41904
41904
41904
41904
41904
41904
41904
41904
41904
41903
41903
41903
41903
41903
41903
41903
41902
41902
41902
41902
41901
41901
41901
41901
41901
41901
41901
41901
41901
41900
41900
41900
41900
41900
41900
41900
41900
41900
41900
41900
41900
41900
41900
41900
41900
41899
41899
41899
41899
41899
41899
41899
41899
41899
41899
41898
41898
41898
41898
41897
41897
41897
41897
41897
41897
41897
41897
41897
41897
41897
41897
41897
41897
41896
41896
41896
41896
41896
41896
41896
41896
41896
41896
41896
41896
41896
41896
41896
41896
41895
41895
41895
41895
41895
41895
41895
41895
41894
41894
41894
41894
41894
41894
41894
41894
41893
41893
41893
41893
41893
41893
41893
41893
41893
41893
41893
41893
41893
41893
41892
41892
41892
41892
41892
41892
41892
41892
41892
41892
41892
41892
41892
41892
41891
41891
41891
41890
41890
41890
41890
41890
41890
41890
41890
41889
41889
41889
41889
41889
41888
41888
41888
41887
41887
41887
41887
41887
41887
41886
41886
41885
41885
41885
41884
41884
41884
41883
41883
41883
41883
41883
41882
41881
41881
41879
41879
41877
41876
41875
41875
41875
41875
41875
41875
41874
41873
41873
41873
41873
41873
41872
41872
41872
41872
41872
41872
41872
41872
41871
41871
41871
41871
41870
41870
41869
41869
41869
41869
41869
41868
41868
41868
41868
41868
41868
41868
41867
41867
41867
41867
41867
41867
41867
41867
41866
41866
41866
41865
41865
41865
41865
41865
41865
41865
41865
41865
41864
41864
41864
41864
41864
41864
41864
41863
41863
41863
41863
41863
41863
41863
41863
41863
41862
41862
41862
41862
41862
41861
41861
41861
41861
41861
41860
41860
41860
41860
41860
41859
41859
41858
41858
41858
41857
41857
41857
41857
41857
41856
41856
41856
41856
41855
41855
41855
41855
41854
41854
41853
41853
41853
41852
41852
41852
41852
41851
41851
41851
41851
41848
41848
41847
41847
41847
41846
41846
41843
41843
41841
41841
41840
41839
41837
41837
41837
41836
41836
41836
41835
41835
41834
41833
41833
41833
41832
41832
41832
41832
41832
41831
41831
41831
41831
41831
41831
41831
41830
41830
41830
41829
41829
41829
41829
41829
41829
41828
41828
41828
41828
41828
41828
41828
41827
41827
41827
41827
41827
41827
41827
41826
41826
41825
41825
41825
41825
41825
41825
41824
41824
41824
41824
41823
41823
41823
41823
41823
41822
41821
41821
41821
41821
41820
41820
41820
41820
41819
41819
41819
41819
41819
41819
41818
41818
41818
41818
41817
41817
41817
41817
41816
41816
41816
41815
41814
41809
41807
41805
[truncated: 85 more rows]
