# Supplementary material for: Research on real-time elimination of UWB radar ranging abnormal value data
Source: Copernicus journal article supplement (doi:10.5194/gi-2019-42), 2020-06-22
Supplement: Supplementary file 4 [file 9.64m.xlsx]

## Sheet: 9.64
9978
9964
9954
9918
9911
9904
9890
9884
9875
9875
9873
9872
9869
9860
9855
9851
9850
9846
9846
9844
9844
9844
9838
9834
9823
9821
9816
9812
9809
9808
9807
9807
9806
9806
9806
9806
9804
9803
9803
9800
9799
9792
9788
9783
9779
9776
9774
9774
9774
9773
9773
9772
9772
9771
9770
9770
9770
9768
9768
9768
9766
9766
9765
9764
9763
9762
9758
9758
9758
9758
9749
9748
9744
9743
9740
9739
9739
9739
9738
9738
9737
9737
9736
9736
9736
9735
9735
9735
9734
9734
9733
9733
9732
9732
9732
9731
9731
9730
9730
9730
9728
9728
9728
9728
9727
9727
9726
9726
9725
9725
9724
9724
9724
9722
9722
9719
9715
9711
9710
9710
9710
9709
9708
9708
9708
9708
9707
9707
9707
9707
9707
9707
9707
9706
9705
9705
9705
9705
9705
9705
9704
9704
9704
9704
9704
9704
9704
9704
9703
9703
9703
9703
9703
9703
9703
9703
9703
9703
9703
9703
9703
9703
9702
9702
9702
9702
9702
9702
9702
9702
9702
9702
9702
9702
9702
9702
9702
9702
9702
9701
9701
9701
9701
9701
9701
9701
9701
9701
9701
9700
9700
9700
9700
9700
9700
9700
9700
9700
9700
9700
9700
9700
9700
9700
9700
9700
9700
9700
9699
9699
9699
9699
9699
9699
9699
9699
9699
9699
9699
9699
9699
9699
9699
9699
9699
9699
9699
9699
9699
9699
9699
9699
9698
9698
9698
9698
9698
9698
9698
9698
9698
9698
9698
9698
9698
9698
9698
9698
9698
9698
9698
9698
9698
9698
9698
9698
9698
9698
9698
9698
9698
9698
9698
9698
9698
9698
9698
9698
9697
9697
9697
9697
9697
9697
9697
9697
9697
9697
9697
9697
9697
9697
9697
9697
9697
9697
9697
9697
9697
9697
9697
9696
9696
9696
9696
9696
9696
9696
9696
9696
9696
9696
9696
9696
9696
9696
9696
9696
9696
9696
9696
9696
9696
9696
9696
9696
9696
9696
9696
9696
9696
9696
9695
9695
9695
9695
9695
9695
9695
9695
9695
9695
9695
9695
9695
9695
9695
9695
9695
9695
9695
9695
9695
9695
9695
9695
9695
9695
9695
9695
9695
9695
9695
9695
9695
9695
9695
9695
9694
9694
9694
9694
9694
9694
9694
9694
9694
9694
9694
9694
9694
9694
9694
9694
9694
9694
9694
9694
9694
9694
9694
9694
9694
9694
9694
9694
9694
9694
9694
9694
9694
9694
9694
9694
9694
9694
9693
9693
9693
9693
9693
9693
9693
9693
9693
9692
9692
9692
9692
9692
9692
9692
9692
9692
9692
9692
9692
9692
9692
9692
9692
9692
9692
9692
9692
9692
9692
9692
9692
9691
9691
9691
9691
9691
9691
9691
9691
9691
9691
9691
9691
9691
9691
9691
9691
9691
9691
9690
9690
9690
9690
9690
9690
9690
9689
9689
9689
9689
9689
9688
9688
9688
9688
9688
9688
9688
9688
9688
9688
9688
9687
9687
9687
9686
9686
9686
9685
9685
9685
9685
9683
9682
9682
9678
9677
9675
9674
9674
9674
9674
9673
9672
9672
9671
9671
9671
9671
9671
9671
9670
9670
9670
9670
9670
9670
9670
9670
9670
9670
9669
9669
9669
9669
9669
9669
9669
9669
9669
9668
9668
9668
9668
9668
9668
9668
9668
9668
9668
9668
9668
9668
9667
9667
9667
9667
9667
9667
9667
9667
9667
9667
9667
9667
9667
9667
9667
9667
9667
9667
9667
9667
9667
9667
9667
9667
9666
9666
9666
9666
9666
9666
9666
9666
9666
9666
9666
9666
9666
9666
9666
9666
9666
9666
9666
9666
9666
9666
9666
9665
9665
9665
9665
9665
9665
9665
9665
9665
9665
9664
9664
9664
9664
9664
9664
9664
9664
9664
9664
9664
9664
9664
9664
9664
9664
9664
9664
9664
9664
9664
9663
9663
9663
9663
9663
9663
9663
9663
9663
9663
9663
9663
9663
9663
9663
9663
9663
9663
9663
9663
9663
9663
9663
9663
9662
9662
9662
9662
9662
9662
9662
9662
9662
9662
9662
9662
9662
9662
9662
9662
9662
9662
9662
9662
9662
9662
9662
9662
9662
9662
9662
9662
9662
9662
9661
9661
9661
9661
9661
9661
9661
9661
9661
9661
9661
9661
9661
9661
9661
9661
9661
9661
9661
9661
9661
9661
9661
9661
9661
9661
9661
9661
9660
9660
9660
9660
9660
9660
9660
9660
9660
9660
9660
9660
9660
9660
9660
9660
9660
9660
9660
9660
9660
9660
9660
9660
9660
9660
9660
9660
9660
9660
9660
9660
9660
9659
9659
9659
9659
9659
9659
9659
9659
9659
9659
9659
9659
9659
9659
9659
9659
9659
9659
9659
9659
9659
9659
9659
9659
9659
9659
9659
9659
9658
9658
9658
9658
9658
9658
9658
9658
9658
9658
9658
9658
9658
9658
9658
9658
9658
9658
9658
9658
9658
9658
9658
9658
9658
9658
9657
9657
9657
9657
9657
9657
9657
9657
9657
9657
9657
9657
9657
9657
9657
9657
9657
9657
9656
9656
9656
9656
9656
9656
9656
9656
9656
9656
9656
9656
9656
9656
9656
9656
9655
9655
9655
9655
9655
9655
9655
9655
9655
9655
9655
9655
9654
9654
9654
9654
9654
9654
9654
9652
9652
9652
9652
9652
9652
9651
9651
9645
9644
9644
9642
9640
9639
9639
9639
9639
9638
9638
9637
9637
9637
9637
9636
9636
9636
9635
9635
9635
9635
9635
9635
9635
9635
9635
9634
9634
9634
9634
9634
9634
9634
9634
9634
9634
9634
9633
9633
9633
9633
9633
9633
9633
9632
9632
9632
9632
9632
9632
9632
9632
9632
9632
9632
9632
9632
9632
9632
9632
9632
9632
9632
9632
9632
9631
9631
9631
9631
9631
9631
9631
9631
9631
9631
9631
9631
9631
9631
9631
9631
9631
9631
9631
9631
9631
9631
9631
9631
9631
9631
9631
9631
9631
9631
9630
9630
9630
9630
9630
9630
9630
9630
9630
9630
9630
9630
9630
9630
9630
9630
9630
9630
9630
9630
9630
9630
9630
9630
9630
9630
9630
9630
9630
9630
9630
9630
9630
9630
9630
9630
9630
9630
9630
9630
9630
9630
9630
9630
9630
9630
9629
9629
9629
9629
9629
9629
9629
9629
9629
9629
9629
9629
9629
9629
9629
9629
9628
9628
9628
9628
9628
9628
9628
9628
9628
9628
9628
9628
9628
9628
9628
9628
9628
9628
9628
9628
9628
9628
9628
9628
9628
9628
9628
9628
9628
9628
9628
9628
9628
9628
9628
9628
9628
9628
9628
9628
9628
9628
9628
9628
9628
9628
9628
9628
9628
9628
9628
9628
9628
9628
9628
9628
9628
9628
9628
9628
9628
9628
9628
9628
9628
9628
9628
9628
9628
9628
9628
9628
9628
9628
9628
9628
9627
9627
9627
9627
9627
9627
9627
9627
9627
9627
9627
9627
9627
9627
9627
9627
9627
9627
9627
9627
9627
9627
9627
9627
9627
9627
9627
9627
9627
9627
9627
9627
9627
9627
9627
9627
9627
9627
9627
9627
9627
9627
9627
9627
9627
9627
9627
9627
9627
9627
9627
9627
9627
9627
9627
9627
9627
9627
9627
9627
9627
9627
9627
9627
9627
9627
9627
9627
9627
9627
9627
9627
9627
9627
9627
9627
9627
9627
9627
9627
9627
9627
9627
9627
9627
9627
9627
9627
9627
9627
9627
9627
9627
9627
9627
9627
9627
9627
9627
9627
9627
9627
9627
9627
9627
9627
9627
9627
9627
9627
9627
9626
9626
9626
9626
9626
9626
9626
9626
9626
9626
9626
9626
9626
9626
9626
9626
9626
9626
9626
9626
9626
9626
9626
9626
9626
9626
9626
9626
9626
9626
9626
9626
9626
9626
9626
9626
9626
9626
9626
9626
9626
9626
9626
9626
9626
9626
9626
9626
9626
9626
9626
9626
9626
9626
9626
9626
9626
9626
9626
9626
9626
9626
9626
9626
9626
9626
9626
9626
9626
9626
9626
9626
9626
9626
9626
9626
9626
9626
9626
9626
9626
9626
9626
9626
9626
9626
9626
9626
9626
9626
9626
9626
9626
9626
9626
9626
9626
9626
9626
9626
9626
9626
9626
9626
9626
9626
9626
9626
9626
9626
9626
9626
9626
9626
9626
9626
9626
9626
9626
9626
9626
9626
9626
9626
9626
9626
9626
9626
9626
9626
9625
9625
9625
9625
9625
9625
9625
9625
9625
9625
9625
9625
9625
9625
9625
9625
9625
9625
9625
9625
9625
9625
9625
9625
9625
9625
9625
9625
9625
9625
9625
9625
9625
9625
9625
9625
9625
9625
9625
9625
9625
9625
9625
9625
9625
9625
9625
9625
9625
9625
9625
9625
9625
9625
9625
9625
9625
9625
9625
9625
9625
9625
9625
9625
9625
9625
9625
9625
9625
9625
9625
9625
9625
9625
9625
9625
9625
9625
9625
9625
9625
9625
9625
9625
9625
9625
9625
9625
9625
9625
9625
9625
9625
9625
9625
9625
9625
9624
9624
9624
9624
9624
9624
9624
9624
9624
9624
9624
9624
9624
9624
9624
9624
9624
9624
9624
9624
9624
9624
9624
9624
9624
9624
9624
9624
9624
9624
9624
9624
9624
9624
9624
9624
9624
9624
9624
9624
9624
9624
9624
9624
9624
9624
9624
9624
9624
9624
9624
9624
9624
9624
9624
9624
9624
9624
9624
9624
9624
9624
9624
9624
9624
9624
9624
9624
9624
9624
9624
9624
9624
9624
9624
9624
9624
9624
9624
9624
9624
9624
9624
9624
9624
9624
9624
9624
9624
9624
9624
9624
9624
9624
9624
9624
9624
9624
9624
9624
9624
9624
9624
9624
9624
9624
9624
9624
9624
9624
9624
9624
9624
9624
9624
9624
9624
9624
9624
9624
9624
9624
9624
9624
9624
9624
9624
9624
9624
9624
9624
9624
9624
9624
9624
9624
9624
9624
9624
9624
9624
9624
9624
9624
9624
9624
9624
9624
9624
9624
9624
9624
9624
9624
9624
9624
9624
9624
9624
9624
9624
9624
9624
9624
9624
9624
9624
9624
9624
9624
9624
9624
9624
9624
9624
9624
9624
9624
9624
9624
9624
9624
9624
9624
9624
9624
9624
9624
9624
9624
9624
9624
9624
9624
9624
9624
9624
9624
9624
9624
9624
9624
9624
9624
9624
9624
9624
9623
9623
9623
9623
9623
9623
9623
9623
9623
9623
9623
9623
9623
9623
9623
9623
9623
9623
9623
9623
9623
9623
9623
9623
9623
9623
9623
9623
9623
9623
9623
9623
9623
9623
9623
9623
9623
9623
9623
9623
9623
9623
9623
9623
9623
9623
9623
9623
9623
9623
9623
9623
9623
9623
9623
9623
9623
9623
9623
9623
9623
9623
9623
9623
9623
9623
9623
9623
9623
9623
9623
9623
9623
9623
9623
9623
9623
9623
9623
9623
9623
9623
9623
9623
9623
9623
9623
9623
9623
9623
9623
9623
9623
9623
9623
9623
9623
9623
9623
9623
9623
9623
9623
9623
9623
9623
9623
9623
9623
9623
9623
9623
9623
9623
9623
9623
9623
9623
9623
9623
9623
9623
9623
9623
9623
9623
9623
9623
9623
9623
9623
9623
9623
9623
9623
9623
9623
9623
9623
9623
9623
9623
9623
9623
9623
9623
9623
9623
9623
9623
9623
9623
9623
9623
9623
9623
9623
9623
9623
9623
9623
9623
9623
9623
9623
9623
9623
9623
9623
9623
9623
9623
9623
9623
9623
9623
9623
9623
9623
9623
9623
9623
9623
9623
9623
9623
9623
9623
9623
9623
9623
9623
9623
9623
9623
9623
9623
9623
9623
9623
9623
9623
9623
9623
9623
9623
9623
9623
9623
9623
9623
9623
9623
9623
9622
9622
9622
9622
9622
9622
9622
9622
9622
9622
9622
9622
9622
9622
9622
9622
9622
9622
9622
9622
9622
9622
9622
9622
9622
9622
9622
9622
9622
9622
9622
9622
9622
9622
9622
9622
9622
9622
9622
9622
9622
9622
9622
9622
9622
9622
9622
9622
9622
9622
9622
9622
9622
9622
9622
9622
9622
9622
9622
9622
9622
9622
9622
9622
9622
9622
9622
9622
9622
9622
9622
9622
9622
9622
9622
9622
9622
9622
9622
9622
9622
9622
9622
9622
9622
9622
9622
9622
9622
9622
9622
9622
9622
9622
9622
9622
9622
9622
9622
9622
9622
9622
9622
9622
9622
9622
9622
9622
9622
9622
9622
9622
9622
9622
9622
9622
9622
9622
9622
9622
9622
9622
9622
9622
9622
9622
9622
9622
9622
9622
9622
9622
9622
9622
9622
9622
9622
9622
9622
9622
9622
9622
9622
9622
9622
9622
9622
9622
9622
9622
9622
9622
9622
9622
9622
9622
9622
9622
9622
9622
9622
9622
9622
9622
9622
9622
9622
9622
[truncated: 794 more rows]
