# Supplementary material for: Research on real-time elimination of UWB radar ranging abnormal value data
Source: Copernicus journal article supplement (doi:10.5194/gi-2019-42), 2020-06-22
Supplement: Supplementary file 5 [file 14.4m.xlsx]

## Sheet: Sheet1
14683
14634
12906
14621
14686
14614
13712
14643
14882
14666
14709
14877
14877
14766
10717
14497
14604
14875
