# Supplementary material for: Research on real-time elimination of UWB radar ranging abnormal value data
Source: Copernicus journal article supplement (doi:10.5194/gi-2019-42), 2020-06-22
Supplement: Supplementary file 6 [file 18m.xlsx]

## Sheet: 30
18049
17873
17994
18459
17995
17984
13787
18281
18471
18897
18028
18028
17858
18455
18486
18561
13572
17998
17153
17355
17992
18464
18003
18471
18505
18014
17997
17997
18454
18439
17973
18009
6185
17362
18468
17897
13118
18035
16611
17782
18385
18467
18399
18483
18045
18742
17986
17886
17766
18483
18377
18375
18402
15108
16673
16057
17999
18045
18289
