# Supplementary material for: Research on real-time elimination of UWB radar ranging abnormal value data
Source: Copernicus journal article supplement (doi:10.5194/gi-2019-42), 2020-06-22
Supplement: Supplementary file 7 [file 20.4m.xlsx]

## Sheet: Sheet1
20426
20520
20552
20441
20557
20446
19883
20505
19428
20458
17223
20481
20482
20491
20466
19851
20553
20434
17213
20272
18916
20435
20541
20416
19970
20036
19720
20519
20322
20509
20509
19113
20424
18945
20430
20479
18145
20457
20432
15002
20459
19051
20343
20414
20494
20459
20472
20429
15608
20445
20102
20426
