# Supplementary material for: Research on real-time elimination of UWB radar ranging abnormal value data
Source: Copernicus journal article supplement (doi:10.5194/gi-2019-42), 2020-06-22
Supplement: Supplementary file 8 [file 22.8m.xlsx]

## Sheet: Sheet1
21688
21688
20039
21379
22909
22879
22864
22844
20599
22859
22872
22879
22891
20610
22779
22379
22345
23728
23834
23734
23834
23830
23794
23830
23742
23383
23781
23728
23837
23768
23834
23895
23772
23773
23833
23774
23828
23834
23832
23837
23773
23792
23832
23772
23831
23798
23797
23839
23778
23770
23832
23835
23384
23734
23734
23772
23831
23342
23401
23771
23383
16754
23895
23732
23329
23410
20427
23741
23777
