# Supplementary material for: Research on real-time elimination of UWB radar ranging abnormal value data
Source: Copernicus journal article supplement (doi:10.5194/gi-2019-42), 2020-06-22
Supplement: Supplementary file 9 [file 27m.xlsx]

## Sheet: Sheet1
27779
27679
27525
27692
27617
27681
27650
27743
27656
27651
27527
27649
27559
27782
27767
27559
27747
27560
27687
27655
27653
27618
27524
27769
27690
27776
27806
27652
27643
27682
27522
27683
27654
27686
27650
27651
27777
27523
27559
27651
27657
27738
27773
27773
27812
27778
27690
27560
27686
27689
27783
27770
27775
27808
25935
27599
27817
27687
27558
27820
26890
27645
27598
27559
27689
27785
27688
27559
27564
27650
27649
27561
27743
27810
27690
27781
27694
17105
27803
27691
27649
27813
27679
27637
27560
27687
27653
27685
27561
27653
27560
27692
27654
27745
27745
27745
27740
