# Supplementary material for: Research on real-time elimination of UWB radar ranging abnormal value data
Source: Copernicus journal article supplement (doi:10.5194/gi-2019-42), 2020-06-22
Supplement: Supplementary file 10 [file 30.6m.xlsx]

## Sheet: Sheet1
31149
31242
31083
31122
31243
31150
31244
31113
31273
31089
31155
31157
31089
31090
31091
31247
31112
31158
31058
31246
31155
31124
31124
31092
31246
31082
31154
31251
31118
31151
31154
31118
31152
31148
31186
31242
31246
31243
31275
31149
31185
31155
31157
31150
31124
31125
31120
31088
31149
31124
31151
31151
31151
31148
31087
31120
31128
31250
31157
31087
31090
31125
31121
31054
31149
31112
31149
31113
31189
31146
31114
31146
31184
31114
31109
31084
31149
31108
31120
31152
31143
31250
31153
