# Supplementary material for: Research on real-time elimination of UWB radar ranging abnormal value data
Source: Copernicus journal article supplement (doi:10.5194/gi-2019-42), 2020-06-22
Supplement: Supplementary file 11 [file 33.6m.xlsx]

## Sheet: Sheet1
34301
34300
34304
34298
34298
34302
34302
34300
34301
34299
34299
34297
34301
34306
34301
34297
34300
34300
34301
34302
34299
34297
34300
34300
34297
34299
34299
34299
34300
34299
34301
34297
34300
34303
34296
34303
34299
34299
34298
34299
34297
34291
34299
34297
34300
34305
34298
34301
34300
34297
34303
34301
34174
34301
34298
34300
34301
34303
34301
34296
34332
34297
34299
34303
34305
34303
34296
34296
34300
34300
34301
34297
34300
34299
34297
34301
34298
34303
34302
34297
34300
34301
34299
34298
34301
34297
34301
34297
34301
34299
34264
34300
34301
34305
34301
34303
34303
34299
34297
34301
34301
34229
34261
34225
34263
34263
34221
34228
34224
34257
34261
