# Supplementary material for: Research on real-time elimination of UWB radar ranging abnormal value data
Source: Copernicus journal article supplement (doi:10.5194/gi-2019-42), 2020-06-22
Supplement: Supplementary file 12 [file 35.4m.xlsx]

## Sheet: Sheet1
36072
36073
36041
36068
36035
36032
36031
36008
36040
36039
36039
36039
36067
36041
36065
36039
35999
36040
36039
36035
36010
36038
36037
36034
36070
36032
36035
36040
36039
36037
36072
36040
36038
36068
36036
36036
36033
36036
36031
36042
36068
36037
36065
36068
36041
36043
36075
36039
36039
36071
36075
36036
36037
36066
36062
