# Supplementary material for: Research on real-time elimination of UWB radar ranging abnormal value data
Source: Copernicus journal article supplement (doi:10.5194/gi-2019-42), 2020-06-22
Supplement: Supplementary file 13 [file 4.2m.xlsx]

## Sheet: Sheet1
4314
4254
4294
4321
4323
4231
4320
4227
4285
4283
4362
4257
4314
4278
4253
4284
4325
4283
4360
4285
4321
4321
4259
4250
4282
4282
4282
4294
4289
