# Supplementary material for: Research on real-time elimination of UWB radar ranging abnormal value data
Source: Copernicus journal article supplement (doi:10.5194/gi-2019-42), 2020-06-22
Supplement: Supplementary file 14 [file 9m.xlsx]

## Sheet: 15
9142
4776
9066
10101
4042
9126
9094
6679
9120
7335
9148
9062
4569
9160
8984
9112
9165
8982
9050
9006
9095
9095
9120
9184
9056
9058
9177
9060
9069
9060
8709
5523
6674
9150
8494
9162
9059
8984
9053
7501
9184
9184
9158
9188
8376
9190
1932
8364
9739
1616
9221
2071
9746
9706
9092
9181
7404
9089
9010
9161
9091
9043
