# Supplementary material for: Research on real-time elimination of UWB radar ranging abnormal value data
Source: Copernicus journal article supplement (doi:10.5194/gi-2019-42), 2020-06-22
Supplement: Supplementary file 15 [file 0.6m.xlsx]

## Sheet: Sheet1
707
711
701
705
711
715
707
709
708
705
708
706
553
711
704
705
709
708
708
707
707
716
716
705
704
707
708
701
708
712
701
707
706
709
708
713
707
708
702
707
712
708
710
707
710
749
702
709
710
705
705
704
707
