# Supplementary material for: Research on real-time elimination of UWB radar ranging abnormal value data
Source: Copernicus journal article supplement (doi:10.5194/gi-2019-42), 2020-06-22
Supplement: Supplementary file 16 [file 1.2m.xlsx]

## Sheet: Sheet1
1250
1256
1227
1251
1254
1288
1252
1251
1254
1252
1251
1255
1254
1253
1247
1246
1249
1246
1251
1246
1223
1251
1246
1253
1254
1249
1226
1249
1248
1223
1219
1254
1254
1253
1252
1249
1245
1173
1253
1254
1251
1254
1251
1250
1252
1247
1251
1249
1222
1247
1251
1247
1253
1251
1249
1255
