# Supplementary material for: Research on real-time elimination of UWB radar ranging abnormal value data
Source: Copernicus journal article supplement (doi:10.5194/gi-2019-42), 2020-06-22
Supplement: Supplementary file 17 [file 1.8m.xlsx]

## Sheet: Sheet1
1923
1911
1845
1915
1915
1922
1852
1913
1886
1887
1873
1908
1885
1880
1923
1923
1877
1885
1879
1877
1917
1873
1913
1880
1885
1886
1916
1912
1914
1885
1926
1877
1913
1876
1886
1913
1924
1881
1879
1911
1887
1877
1916
1837
1883
1928
1909
1880
1888
1849
1877
1924
1910
1910
1887
