# Supplementary material for: Research on real-time elimination of UWB radar ranging abnormal value data
Source: Copernicus journal article supplement (doi:10.5194/gi-2019-42), 2020-06-22
Supplement: Supplementary file 18 [file 10.2m.xlsx]

## Sheet: Sheet1
9308
10225
9927
11047
10882
10867
11039
11072
10925
10925
11539
11122
11083
10270
11425
10939
11179
11156
11016
11016
10975
11120
10520
