# Supplementary material for: Research on real-time elimination of UWB radar ranging abnormal value data
Source: Copernicus journal article supplement (doi:10.5194/gi-2019-42), 2020-06-22
Supplement: Supplementary file 19 [file 10.8m.xlsx]

## Sheet: Sheet1
10663
10987
10857
10936
10956
10886
10801
10861
10899
11005
11005
10856
10449
10833
10833
197
10900
10973
10973
10967
10951
10897
10868
