# Supplementary material for: Research on real-time elimination of UWB radar ranging abnormal value data
Source: Copernicus journal article supplement (doi:10.5194/gi-2019-42), 2020-06-22
Supplement: Supplementary file 20 [file 11.4m.xlsx]

## Sheet: Sheet1
9794
10856
12291
12423
13200
7601
13102
12184
13102
7568
13207
13065
12325
9422
13195
13198
13101
11085
12211
13202
13069
13195
13201
8359
12966
11834
12331
12971
12971
13198
