# Supplementary material for: Research on real-time elimination of UWB radar ranging abnormal value data
Source: Copernicus journal article supplement (doi:10.5194/gi-2019-42), 2020-06-22
Supplement: Supplementary file 21 [file 12.6m.xlsx]

## Sheet: Sheet1
12623
13447
12246
13524
8937
12745
13524
13441
13508
12347
13075
12766
13522
13117
13534
13336
13525
13500
12736
13281
12799
13001
13426
