# Supplementary material for: Research on real-time elimination of UWB radar ranging abnormal value data
Source: Copernicus journal article supplement (doi:10.5194/gi-2019-42), 2020-06-22
Supplement: Supplementary file 22 [file 12m.xlsx]

## Sheet: Sheet1
11929
19549
12149
11874
11910
12211
12172
12144
12360
12360
11875
12146
11609
12197
11950
12108
12172
12107
12188
11836
12392
12012
11982
