# Supplementary material for: Research on real-time elimination of UWB radar ranging abnormal value data
Source: Copernicus journal article supplement (doi:10.5194/gi-2019-42), 2020-06-22
Supplement: Supplementary file 23 [file 13.2m.xlsx]

## Sheet: Sheet1
13401
13074
13310
13330
13419
13384
12666
13389
13389
12998
13385
13269
13263
13107
