# Supplementary material for: Research on real-time elimination of UWB radar ranging abnormal value data
Source: Copernicus journal article supplement (doi:10.5194/gi-2019-42), 2020-06-22
Supplement: Supplementary file 24 [file 13.8m.xlsx]

## Sheet: Sheet1
13981
14048
13976
13947
13882
13882
14020
13924
14030
12887
14083
