# Supplementary material for: Research on real-time elimination of UWB radar ranging abnormal value data
Source: Copernicus journal article supplement (doi:10.5194/gi-2019-42), 2020-06-22
Supplement: Supplementary file 25 [file 15.6m.xlsx]

## Sheet: Sheet1
16046
16046
16038
