# Supplementary material for: Research on real-time elimination of UWB radar ranging abnormal value data
Source: Copernicus journal article supplement (doi:10.5194/gi-2019-42), 2020-06-22
Supplement: Supplementary file 26 [file 15m.xlsx]

## Sheet: Sheet1
15596
15516
15479
15449
3084
15371
15187
15513
15476
15115
15590
15411
15480
15384
15474
15411
