# Supplementary material for: Research on real-time elimination of UWB radar ranging abnormal value data
Source: Copernicus journal article supplement (doi:10.5194/gi-2019-42), 2020-06-22
Supplement: Supplementary file 27 [file 16.2m.xlsx]

## Sheet: 27
16091
16476
16364
16542
16439
16442
16346
16346
16425
16425
12777
16480
16337
4241
16474
16368
14117
16470
16440
16477
16303
16371
16386
16223
16341
16367
16504
16351
16514
16442
16470
16513
10488
16194
16476
16514
16463
16505
16468
16466
16537
16386
16313
11834
16545
16651
16287
16159
16367
12324
16498
16300
16438
11164
14823
16649
16217
16477
16405
10847
14917
16402
16650
16466
16514
16288
16386
16313
11470
