# Supplementary material for: Research on real-time elimination of UWB radar ranging abnormal value data
Source: Copernicus journal article supplement (doi:10.5194/gi-2019-42), 2020-06-22
Supplement: Supplementary file 28 [file 16.8m.xlsx]

## Sheet: 28
16776
16511
14712
16817
16780
16772
16772
17380
16205
16376
14695
16733
16829
16580
16416
16416
12750
16733
16829
16817
16816
16819
16823
16780
16782
16804
16745
17378
15989
16489
16805
16817
16561
16117
16821
17399
14530
16765
16761
16815
16782
15838
16811
16811
7402
16785
17413
16452
13803
16761
14739
16512
16532
16728
16812
16632
12006
13853
16779
16735
16807
15554
17494
16668
12702
