# Supplementary material for: Research on real-time elimination of UWB radar ranging abnormal value data
Source: Copernicus journal article supplement (doi:10.5194/gi-2019-42), 2020-06-22
Supplement: Supplementary file 29 [file 17.4m.xlsx]

## Sheet: 29
17707
17470
17321
17603
17701
16039
17275
18254
13653
17714
17357
18091
17271
18003
17368
17342
17003
14455
16974
15588
17145
17861
17439
17629
17420
14486
16583
17892
17011
17410
15192
16860
17984
17382
17714
17091
16776
17413
17865
17726
17835
17134
14439
15923
17011
