# Supplementary material for: Research on real-time elimination of UWB radar ranging abnormal value data
Source: Copernicus journal article supplement (doi:10.5194/gi-2019-42), 2020-06-22
Supplement: Supplementary file 30 [file 18.6m.xlsx]

## Sheet: Sheet1
18627
17235
13709
18587
18682
18829
18825
18913
19098
18573
18788
18663
18729
18937
18758
18803
18589
15666
19010
18901
18223
18769
18827
18523
16284
18914
18490
14035
18586
17425
18539
16711
18917
13588
18612
17299
18791
18646
18799
15044
18869
18430
18634
17592
18855
18624
18643
16362
13620
18588
18809
18614
16603
18621
18381
18822
18750
18782
