# Supplementary material for: Research on real-time elimination of UWB radar ranging abnormal value data
Source: Copernicus journal article supplement (doi:10.5194/gi-2019-42), 2020-06-22
Supplement: Supplementary file 31 [file 19.2m.xlsx]

## Sheet: 32
19273
19274
19811
19840
17846
17905
17905
17248
19270
14178
18688
14291
19251
18823
18803
19236
19220
16580
19256
18970
19262
18727
17024
19121
19217
19251
19246
18806
19261
18904
19122
18256
18878
19180
19239
19220
19228
19270
19042
19226
18593
19064
19248
18213
19262
18865
14315
19250
19240
19247
19293
19235
18871
19225
19242
16197
19207
17740
18292
19238
16127
19265
19022
19091
19255
18659
18946
18891
18496
19262
17818
17816
18889
19219
9158
19269
17065
18695
18548
19282
6635
18219
16046
18045
19230
19223
19237
17018
14330
19041
17892
19167
19245
15057
18229
19272
19230
16017
17798
19246
19195
14351
17874
14255
19241
19160
19111
19240
16317
19220
19219
19273
19149
16773
18913
19261
19241
