# Supplementary material for: Research on real-time elimination of UWB radar ranging abnormal value data
Source: Copernicus journal article supplement (doi:10.5194/gi-2019-42), 2020-06-22
Supplement: Supplementary file 32 [file 19.8m.xlsx]

## Sheet: 33
19858
20302
20337
20347
19635
20356
20357
19879
19858
20345
19991
19681
20282
18398
19302
19357
20290
14609
20301
19097
19853
20290
18551
19699
20338
16354
18879
19915
20344
20064
20250
15391
19358
19803
20343
17563
19828
20371
20317
20301
19852
19823
16265
19829
19879
20337
20329
20321
19547
15460
16521
20366
20079
19857
20143
18198
20841
17196
18958
15812
20243
20342
19914
16676
20319
19860
20310
20338
20841
19115
20312
19810
18279
20369
18524
17475
15582
17082
20290
20290
19381
19447
19847
17379
19763
18269
20365
