# Supplementary material for: Research on real-time elimination of UWB radar ranging abnormal value data
Source: Copernicus journal article supplement (doi:10.5194/gi-2019-42), 2020-06-22
Supplement: Supplementary file 33 [file 2.4m.xlsx]

## Sheet: Sheet1
2523
2520
2475
2525
2519
2523
2486
2455
2512
2487
2517
2512
2512
2479
2524
2441
2474
2476
2459
2484
2524
2484
2513
2512
2519
2510
2482
2485
2515
2482
2512
2482
2522
2516
2520
2482
2519
2487
2524
2520
2485
2487
2485
2515
2487
2520
2522
2521
2516
2485
2511
2512
