# Supplementary material for: Research on real-time elimination of UWB radar ranging abnormal value data
Source: Copernicus journal article supplement (doi:10.5194/gi-2019-42), 2020-06-22
Supplement: Supplementary file 34 [file 21.6m.xlsx]

## Sheet: Sheet1
21377
20551
21695
22655
21691
21846
20227
21625
21686
21672
21468
21679
21651
21668
21656
21690
21699
16619
21672
17307
21696
21671
20643
21635
21644
21679
21685
21665
20170
21655
21663
21687
19266
18578
21703
21127
21682
21655
21694
18660
21693
21538
22176
21628
18412
21666
21684
21636
21692
21695
21184
20572
21669
21400
21623
21036
21613
21650
16640
21699
19833
22150
21607
21487
21538
21670
