# Supplementary material for: Research on real-time elimination of UWB radar ranging abnormal value data
Source: Copernicus journal article supplement (doi:10.5194/gi-2019-42), 2020-06-22
Supplement: Supplementary file 35 [file 21m.xlsx]

## Sheet: 35
21101
21033
21129
21047
17896
21080
20442
17825
21087
21042
21091
20626
21081
21098
20962
21068
20314
21099
20610
21055
21056
21015
21083
21033
21084
21089
21044
20933
20997
20942
21155
21043
21044
19488
16015
20672
21017
21053
21073
21090
18570
21087
21088
21050
21013
18488
21081
21004
21059
18699
20538
19516
8208
20997
18619
21009
20978
19604
20835
21010
21076
20503
20458
20898
20375
