# Supplementary material for: Research on real-time elimination of UWB radar ranging abnormal value data
Source: Copernicus journal article supplement (doi:10.5194/gi-2019-42), 2020-06-22
Supplement: Supplementary file 36 [file 22.2m.xlsx]

## Sheet: 37
22246
22289
22205
23140
22229
22234
20674
19920
19890
21440
22257
22229
22268
21829
21983
19898
22157
18852
22270
22243
22212
22270
22224
22234
22212
22222
20710
17295
22170
21447
22744
22264
22263
19498
22133
22159
22207
22043
22298
22273
22735
22298
21612
21664
20753
22747
22170
21692
22779
22779
22765
22226
21896
22234
22273
22166
22280
19935
20765
5606
21619
21667
22249
22252
21925
22238
21786
21855
21975
22268
22071
22290
22222
22260
22238
22113
