# Supplementary material for: Research on real-time elimination of UWB radar ranging abnormal value data
Source: Copernicus journal article supplement (doi:10.5194/gi-2019-42), 2020-06-22
Supplement: Supplementary file 37 [file 23.4m.xlsx]

## Sheet: 39
23413
22071
23420
23365
23402
23399
23451
23433
20902
23434
23176
22639
23494
23460
23422
23466
23442
23465
23417
23454
23454
23466
23437
23441
23462
20750
23219
23402
22843
23459
23418
23433
23472
23448
23448
23381
21088
22589
22913
23425
23388
20941
23233
23453
23423
23279
23424
23428
23399
23435
23360
22968
23457
23470
21940
23302
22415
23415
23472
22933
20733
23336
23448
23475
19309
23452
23487
23440
23453
23426
23501
21131
18483
20915
23389
22728
23484
23370
23442
20187
22970
23469
14813
23416
23472
