# Supplementary material for: Research on real-time elimination of UWB radar ranging abnormal value data
Source: Copernicus journal article supplement (doi:10.5194/gi-2019-42), 2020-06-22
Supplement: Supplementary file 38 [file 24.6m.xlsx]

## Sheet: Sheet1
25031
22216
24646
25137
25188
25313
24926
24911
25160
21267
25122
25163
25226
25151
25125
25136
25166
25162
25232
25007
25126
24923
24822
25156
24907
25156
24933
23363
23106
25155
25124
25161
24913
25011
24770
25153
24937
24918
24794
24914
25080
24915
25152
19736
24917
25155
25132
25148
24630
25170
24932
24813
25161
25112
24902
25133
25009
25171
25052
25128
25208
25238
25376
25176
25106
25096
24205
25128
24901
