# Supplementary material for: Research on real-time elimination of UWB radar ranging abnormal value data
Source: Copernicus journal article supplement (doi:10.5194/gi-2019-42), 2020-06-22
Supplement: Supplementary file 39 [file 24m.xlsx]

## Sheet: Sheet1
24956
24948
24769
24763
24995
24478
23550
24945
24479
24516
24490
24351
20300
21582
24526
24053
23993
21914
24044
24067
24458
22386
24913
24498
24104
24474
24370
24875
20833
24506
24491
24030
24488
24445
23914
24009
23939
24063
24060
24427
24069
24504
24005
24469
24089
23999
24914
24013
24459
24475
24789
24600
24213
18866
24492
21631
24992
23375
24482
24463
24857
24985
24954
24954
24874
24953
24910
