# Supplementary material for: Research on real-time elimination of UWB radar ranging abnormal value data
Source: Copernicus journal article supplement (doi:10.5194/gi-2019-42), 2020-06-22
Supplement: Supplementary file 40 [file 25.2m.xlsx]

## Sheet: Sheet1
22174
25496
25943
25979
25978
25975
22767
25966
25976
25975
25940
25980
25978
25979
25977
25891
25968
25972
19677
25974
25975
25976
25976
25979
25978
25979
25976
25973
25976
25976
25980
25983
25981
25977
25973
25977
25976
25978
25230
25982
25983
25977
25980
25969
25960
25972
25972
25979
25975
25983
25972
25979
25976
25976
25982
24020
25982
25978
25972
25978
25971
25980
25981
25976
25974
25975
25974
25972
25972
22030
25980
25976
25967
24314
25970
25984
25976
25975
25974
25721
25683
25546
22191
25512
25527
25492
25533
25907
25907
25639
25502
