# Supplementary material for: Research on real-time elimination of UWB radar ranging abnormal value data
Source: Copernicus journal article supplement (doi:10.5194/gi-2019-42), 2020-06-22
Supplement: Supplementary file 41 [file 25.8m.xlsx]

## Sheet: Sheet1
26505
26540
26550
26501
26529
26459
26500
26501
26498
26539
26462
26498
26455
26457
26502
26496
26460
26503
26544
26538
26537
26463
26464
26459
26460
26459
26460
26461
26460
26459
26465
26502
26463
26499
26461
26498
26500
26467
26461
26460
26459
26500
26462
26461
26459
26462
26463
26466
26499
26542
26505
26461
26463
26463
26459
26457
26461
26456
26451
26498
26463
26494
26540
26443
26489
26581
26442
26529
26487
