# Supplementary material for: Research on real-time elimination of UWB radar ranging abnormal value data
Source: Copernicus journal article supplement (doi:10.5194/gi-2019-42), 2020-06-22
Supplement: Supplementary file 42 [file 26.4m.xlsx]

## Sheet: Sheet1
27260
26961
27092
27272
27225
27134
27231
27267
27262
27092
27229
27258
27092
27268
27225
27264
27092
27267
27270
27231
27035
27127
27264
27064
27089
27231
27225
27092
27137
27089
27266
27139
27101
26965
27007
27001
27125
27091
27097
27127
27263
27262
27261
26969
26969
27087
27099
27091
27140
26967
27135
27101
27138
27099
27267
