# Supplementary material for: Research on real-time elimination of UWB radar ranging abnormal value data
Source: Copernicus journal article supplement (doi:10.5194/gi-2019-42), 2020-06-22
Supplement: Supplementary file 43 [file 27.6m.xlsx]

## Sheet: 46
28276
28239
28325
28288
28328
28253
28262
28257
28258
28260
28259
28261
28262
28256
28290
28180
28260
28258
28261
28260
28292
28181
28290
28260
28260
28257
28259
28256
28261
28176
28259
28262
28256
28289
28177
28293
28257
28292
28140
28204
28179
28264
28128
28264
28171
28185
28181
28181
28096
28174
28324
28324
