# Supplementary material for: Research on real-time elimination of UWB radar ranging abnormal value data
Source: Copernicus journal article supplement (doi:10.5194/gi-2019-42), 2020-06-22
Supplement: Supplementary file 44 [file 28.2.xlsx]

## Sheet: 47
28734
28771
28732
28738
28734
28734
28738
28696
28775
28697
28732
28731
28738
28693
28737
28738
28691
28733
28734
28627
28700
28735
28738
28735
28732
28738
28734
28701
28659
28808
28703
28703
28736
28732
28732
28735
28662
28659
28740
28698
28699
28699
28696
28695
28736
28734
28663
28735
28695
28657
28703
28660
28734
28735
28661
28700
28701
28737
28668
28733
28736
28734
28848
28807
28735
