# Supplementary material for: Research on real-time elimination of UWB radar ranging abnormal value data
Source: Copernicus journal article supplement (doi:10.5194/gi-2019-42), 2020-06-22
Supplement: Supplementary file 45 [file 28.8m.xlsx]

## Sheet: Sheet1
29304
29137
29330
29255
29333
29464
29573
29573
29504
29501
29505
29507
29539
29501
29540
29502
29504
29507
29578
29504
29503
29540
29534
29542
29502
29539
29500
29541
29483
29580
29537
29576
29576
29575
29572
29544
29577
29540
29542
29444
29488
29446
29419
29534
29405
29329
29367
28846
