# Supplementary material for: Research on real-time elimination of UWB radar ranging abnormal value data
Source: Copernicus journal article supplement (doi:10.5194/gi-2019-42), 2020-06-22
Supplement: Supplementary file 46 [file 29.4m.xlsx]

## Sheet: Sheet1
29960
30040
30040
29960
29923
29919
29923
29920
29961
29888
29959
29957
29923
29919
29917
29954
29881
29919
29960
29959
29922
29959
29919
29956
29923
29922
29953
29919
29888
29955
29916
29924
29915
29918
29917
29953
29957
29954
29955
