# Supplementary material for: Research on real-time elimination of UWB radar ranging abnormal value data
Source: Copernicus journal article supplement (doi:10.5194/gi-2019-42), 2020-06-22
Supplement: Supplementary file 47 [file 3.6m.xlsx]

## Sheet: Sheet1
3687
3725
3692
3718
3723
3724
3690
3688
3689
3722
108
3684
3655
3691
3724
3657
3677
3725
3691
3723
3687
3715
3727
3727
3686
3723
3721
3728
3723
3721
3685
