# Supplementary material for: Research on real-time elimination of UWB radar ranging abnormal value data
Source: Copernicus journal article supplement (doi:10.5194/gi-2019-42), 2020-06-22
Supplement: Supplementary file 48 [file 30m.xlsx]

## Sheet: Sheet1
30512
29995
30513
30122
30512
30334
30478
30514
30331
30315
30342
30482
30483
30514
30290
30328
30116
30482
30305
30477
30320
30516
30549
25212
30482
30516
30480
29803
30336
30486
30332
30527
30517
30512
30486
30300
30324
