# Supplementary material for: Research on real-time elimination of UWB radar ranging abnormal value data
Source: Copernicus journal article supplement (doi:10.5194/gi-2019-42), 2020-06-22
Supplement: Supplementary file 49 [file 31.2m.xlsx]

## Sheet: Sheet1
31919
31896
31896
31688
31934
31934
31859
31933
31863
31901
31869
31869
31900
31929
31903
31864
31907
31863
31930
31902
31940
31902
31902
31862
31905
31936
31906
31870
31897
31934
31900
31868
31902
31899
31896
31932
31870
31871
31903
31877
31866
31934
31899
31936
31864
31872
31865
31938
31898
31899
31932
31864
31900
31903
31873
31867
31903
31938
31937
31935
31927
31938
