# Supplementary material for: Research on real-time elimination of UWB radar ranging abnormal value data
Source: Copernicus journal article supplement (doi:10.5194/gi-2019-42), 2020-06-22
Supplement: Supplementary file 50 [file 31.8m.xlsx]

## Sheet: Sheet1
32494
32522
32521
32518
32519
32518
32518
32524
32524
32530
32518
32522
32522
32528
32518
32524
32520
32518
32524
32524
32518
32522
32516
32526
32520
32523
32518
32521
32521
32529
32525
32519
32482
32514
32520
32525
32520
32525
32525
32522
32519
32522
32522
32522
32520
32494
32450
32522
32522
32522
32518
32519
32521
32525
32524
32524
32526
32522
32526
32524
