# Supplementary material for: Research on real-time elimination of UWB radar ranging abnormal value data
Source: Copernicus journal article supplement (doi:10.5194/gi-2019-42), 2020-06-22
Supplement: Supplementary file 51 [file 32.4m.xlsx]

## Sheet: Sheet1
33117
33120
33075
33113
33117
33117
33088
33108
33118
33118
33078
33113
33116
33112
33072
33076
33121
33115
33117
33083
33083
33118
33117
33118
33122
33120
33118
33117
33112
33121
33119
33048
33044
33087
33085
33083
33116
33113
33110
33074
33069
33118
33083
33117
33049
33047
33118
33048
33048
33119
33114
33044
33084
