# Supplementary material for: Research on real-time elimination of UWB radar ranging abnormal value data
Source: Copernicus journal article supplement (doi:10.5194/gi-2019-42), 2020-06-22
Supplement: Supplementary file 52 [file 33m.xlsx]

## Sheet: 55
33670
33671
33709
33710
33707
33707
33709
33710
33714
33710
33711
33708
33709
33707
33709
33706
33704
33711
33713
33710
33709
33706
33706
33708
33707
33708
33715
33711
33710
33706
33705
33707
33703
33711
33710
33706
33707
33709
33706
33707
33714
33706
33704
33710
33707
33708
33710
33706
33707
33705
33707
33710
33708
33711
33708
33710
33713
33711
33707
33711
33708
33704
33713
33710
33710
33714
33708
33706
33711
33710
33712
33713
33705
33711
33707
33711
33708
33711
33708
33711
33706
33703
33711
33709
33705
33670
33667
33671
33637
33630
33635
33211
33634
33638
33633
33639
33625
33676
33632
33632
