# Supplementary material for: Research on real-time elimination of UWB radar ranging abnormal value data
Source: Copernicus journal article supplement (doi:10.5194/gi-2019-42), 2020-06-22
Supplement: Supplementary file 53 [file 34.8m.xlsx]

## Sheet: 58
35477
35480
35480
35477
35479
35480
35476
35483
35480
35448
35480
35446
35482
35480
35477
35476
35483
35477
35482
35477
35480
35476
35481
35477
35475
35441
35480
35440
35484
35477
35485
35477
35440
35482
35474
35478
35449
35480
35473
35449
35477
35480
35476
35450
35456
35444
35474
35477
35441
35477
35480
35477
35478
35477
35480
35481
35478
35484
35470
35477
35478
35441
35478
35480
35474
35477
35444
35484
35480
