# Supplementary material for: Research on real-time elimination of UWB radar ranging abnormal value data
Source: Copernicus journal article supplement (doi:10.5194/gi-2019-42), 2020-06-22
Supplement: Supplementary file 54 [file 36m.xlsx]

## Sheet: Sheet1
36590
36640
36668
36594
36523
36583
36551
36439
36586
36591
36515
36588
36599
36517
36593
36589
36555
36585
36515
36513
36589
36589
36589
36547
36516
36589
36590
36595
36517
36589
36585
36598
36509
36475
36661
36655
35631
36658
36664
36598
36473
36399
36519
36475
36590
36663
36659
36535
36631
36661
36503
36669
36666
36654
36661
36679
36657
36671
36669
36506
36661
