# Supplementary material for: Research on real-time elimination of UWB radar ranging abnormal value data
Source: Copernicus journal article supplement (doi:10.5194/gi-2019-42), 2020-06-22
Supplement: Supplementary file 55 [file 3m.xlsx]

## Sheet: Sheet1
3121
3085
3118
3083
3116
3126
3124
3121
3122
3120
3090
3124
3059
3118
3050
3125
3117
3085
3085
3085
3126
3090
3060
3088
3064
3061
3061
3122
3060
3093
3089
3122
3124
3098
