# Supplementary material for: Research on real-time elimination of UWB radar ranging abnormal value data
Source: Copernicus journal article supplement (doi:10.5194/gi-2019-42), 2020-06-22
Supplement: Supplementary file 56 [file 4.8m.xlsx]

## Sheet: Sheet1
4885
4885
4887
4917
4891
4882
4884
4890
4924
4882
4883
4884
4877
4886
4883
4892
4882
4880
4891
4855
4888
4886
4886
4882
4881
4892
4883
4925
4882
4882
4889
4883
4880
4882
4888
4881
4970
4885
4928
4928
4919
4884
4885
4896
4883
4916
4893
4921
4804
4883
4914
4896
4922
4877
4883
4886
4881
4897
4921
4925
