# Supplementary material for: Research on real-time elimination of UWB radar ranging abnormal value data
Source: Copernicus journal article supplement (doi:10.5194/gi-2019-42), 2020-06-22
Supplement: Supplementary file 57 [file 5.4m.xlsx]

## Sheet: Sheet1
5488
208
5492
5457
5462
5530
5530
5490
5492
5492
5492
5492
5494
5490
5525
5493
5487
5490
5487
3698
5491
5490
5492
5494
5491
5494
5488
5488
5491
5526
5520
5487
5487
5495
5484
5493
5530
5446
5492
5492
5490
5491
5494
5495
