# Supplementary material for: Research on real-time elimination of UWB radar ranging abnormal value data
Source: Copernicus journal article supplement (doi:10.5194/gi-2019-42), 2020-06-22
Supplement: Supplementary file 58 [file 6.6m.xlsx]

## Sheet: Sheet1
6444
4929
6641
6660
5968
7686
7905
6652
6609
9167
6656
6693
6711
6603
6665
7928
6598
6670
6198
6643
6696
6591
6670
7829
7851
7805
6644
7668
7668
6683
6680
6694
6325
6659
6997
7958
7899
6666
5416
6711
6688
6039
6691
6703
6642
6667
7961
6739
