# Supplementary material for: Research on real-time elimination of UWB radar ranging abnormal value data
Source: Copernicus journal article supplement (doi:10.5194/gi-2019-42), 2020-06-22
Supplement: Supplementary file 59 [file 6m.xlsx]

## Sheet: Sheet1
3443
6158
6168
6085
6177
6118
6117
6122
6081
6080
6086
6116
6128
6050
6120
4595
6092
6090
6081
6084
6113
94
6081
6082
6089
6082
6174
6117
6085
6118
6052
6080
6083
6118
6079
6084
6125
6118
6117
6017
6172
6120
6132
6088
6120
6089
6080
6123
3049
6083
6085
6080
6081
