# Supplementary material for: Research on real-time elimination of UWB radar ranging abnormal value data
Source: Copernicus journal article supplement (doi:10.5194/gi-2019-42), 2020-06-22
Supplement: Supplementary file 60 [file 7.2m.xlsx]

## Sheet: Sheet1
8541
9930
9966
9972
8401
7885
9787
9932
7368
8319
8579
7812
7340
7237
8598
7307
7330
7222
7292
8486
3172
6986
8607
7294
8565
8533
8531
8513
7788
9755
8506
8625
8552
9784
9929
8578
8533
7323
9894
9966
