# Supplementary material for: Research on real-time elimination of UWB radar ranging abnormal value data
Source: Copernicus journal article supplement (doi:10.5194/gi-2019-42), 2020-06-22
Supplement: Supplementary file 61 [file 7.8m.xlsx]

## Sheet: Sheet1
3541
1802
7934
7927
7923
7927
7969
7928
7308
7972
7972
7883
7971
8022
8023
7933
8023
7886
7929
8019
4912
7971
7959
7929
7925
3476
7967
7971
7785
8006
8016
7960
8025
7969
7961
7964
8024
7933
7965
8023
7924
7962
7937
7969
7937
7924
7981
4042
7964
7931
134
7957
7965
8011
7967
7919
66
8017
7811
7980
