# Supplementary material for: Research on real-time elimination of UWB radar ranging abnormal value data
Source: Copernicus journal article supplement (doi:10.5194/gi-2019-42), 2020-06-22
Supplement: Supplementary file 62 [file 8.4m.xlsx]

## Sheet: Sheet1
9559
449
8494
10784
8953
8523
10785
10789
9652
4219
4554
9670
9136
8462
10783
10787
9643
