# Supplementary material for: Research on real-time elimination of UWB radar ranging abnormal value data
Source: Copernicus journal article supplement (doi:10.5194/gi-2019-42), 2020-06-22
Supplement: Supplementary file 63 [file 9.6m.xlsx]

## Sheet: 16
9847
10556
9795
10277
10565
9770
9666
9764
9360
9855
10520
2477
10561
9823
10596
10591
10533
10554
2285
9759
9762
10594
10569
11428
10616
10638
8198
9871
10510
10596
10468
9723
10548
10548
